# Supplementary material
Source: PubMed Central journal article supplement (PMC7483988)
Supplement: NIHMS1593998-supplement-1593998_Sup_Fig_1.pdf [file NIHMS1593998-supplement-1593998_Sup_Fig_1.pdf]

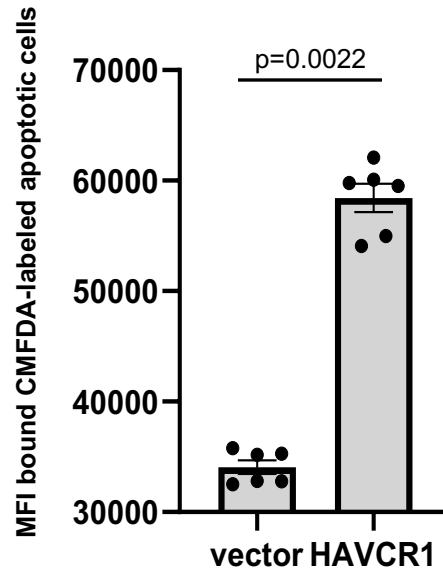

**Supplemental Fig. 1.** Binding of apoptotic cells to HEK-293 cells expressing HAVCR1. Subconfluent monolayers of Vector- and HAVCR1-transfected cells in 12-well plates were incubated with CMFDA-labeled Jurkat apoptotic cells for 30 min at room temperature, monolayers were washed extensively, and fluorescence of bound apoptotic cells was measured using a plate reader. Data are mean  $\pm$  sem of 3 independent experiments with biological duplicates. *P* value between vector- and HAVCR1-transfected cells was determined by unpaired, two-sided Mann-Whitney test. Increased binding of apoptotic cells to HAVCR1 transfectants indicated the HAVCR1 receptor was expressed as an active phosphatidylserine receptor at the cell surface.
